# Supplementary material
Source: PubMed Central journal article supplement (PMC10620946)
Supplement: NIHMS1938229-supplement-Supplement.pdf [file NIHMS1938229-supplement-Supplement.pdf]

## Supporting Information

### Identification of Small Molecule Inhibitors of RNase L by Fragment-Based Drug Discovery

**Jinle Tang<sup>1#</sup>, Beihua Dong<sup>2#</sup>, Ming Liu<sup>1</sup>, Shuyan Liu<sup>3</sup>, Xiaogang Niu<sup>4</sup>, Christina Gaughan<sup>2</sup>, Abhishek Asthana<sup>2</sup>, Huan Zhou<sup>5</sup>, Zhengshuang Xu<sup>1</sup>, Guoliang Zhang<sup>3</sup>, Robert H. Silverman<sup>2\*</sup>, Hao Huang<sup>1\*</sup>**

<sup>1</sup>State Key Laboratory of Chemical Oncogenomics, Laboratory of Structural Biology and Drug Discovery, School of Chemical Biology and Biotechnology, Peking University Shenzhen Graduate School, Shenzhen 518055, China

<sup>2</sup>Department of Cancer Biology, Lerner Research Institute, Cleveland Clinic, Cleveland, OH 44195, USA

<sup>3</sup>National Clinical Research Center for Infectious Diseases, Shenzhen Third People's Hospital, Southern University of Science and Technology, Shenzhen 518112, China

<sup>4</sup>College of Chemistry and Molecular Engineering, Beijing Nuclear Magnetic Resonance Center, Peking University, Beijing 100871, China

<sup>5</sup>Shanghai Advanced Research Institute, Chinese Academy of Sciences, Shanghai 201214, China.

# These authors contributed equally to this work.

\*To whom correspondence should be addressed:

E-mail:

Hao Huang - (Email: [huang.hao@pku.edu.cn](mailto:huang.hao@pku.edu.cn))

Robert H. Silverman - (Email: [SILVERR@ccf.org](mailto:SILVERR@ccf.org))

## Table of Contents

|           | Item                                                                                                                                                                                 | Page              |
|-----------|--------------------------------------------------------------------------------------------------------------------------------------------------------------------------------------|-------------------|
| <b>1</b>  | Inhibition constants ( $IC_{50}$ ) and ligand efficiencies (LE) of fragments identified in activity-based screening against human (H-) and porcine (P-) RNase L proteins. (Table S1) | <b>S3,<br/>S4</b> |
| <b>2</b>  | The potency of AC40357 derivatives against human (H-) and porcine (P-) RNase L (Table S2)                                                                                            | <b>S5</b>         |
| <b>3</b>  | The inhibition rates of several fragments against porcine RNase L (Figure S1)                                                                                                        | <b>S6</b>         |
| <b>4</b>  | Co-crystal structure of the dimeric P-RNase L in complex with the fragment KM05073 (Figure S2)                                                                                       | <b>S6</b>         |
| <b>5</b>  | The Fo-Fc electron density omit map of fragments and the 2D Ligand interaction diagrams (Figure S3)                                                                                  | <b>S7</b>         |
| <b>6</b>  | Critical residues in the fragments binding pocket are conserved in both human and porcine RNase L (Figure S4)                                                                        | <b>S8</b>         |
| <b>7</b>  | The potency of six myricetin derivatives against human and porcine RNase L (Figure S5)                                                                                               | <b>S8</b>         |
| <b>8</b>  | RNA substrate concentration does not affect the inhibition of hyperoside against porcine RNase L (Figure S6)                                                                         | <b>S9</b>         |
| <b>9</b>  | STD-NMR showed vitexin directly binds to P-RNase L (Figure S7)                                                                                                                       | <b>S9</b>         |
| <b>10</b> | The density map of myricetin and structural comparison (Figure S8)                                                                                                                   | <b>S10</b>        |
| <b>11</b> | The potency of hyperoside was not affected by 2-5A binding (Figure S9)                                                                                                               | <b>S10</b>        |

**Table S1.** Inhibition constants ( $IC_{50}$ ) and ligand efficiencies (LE) of fragments identified in activity-based screening against human (H-) and porcine (P-) RNase L proteins.

| NO. | Fragment | 2D-structure                                                                        | $IC_{50}$ ( $\mu$ M) |           | LE        |           |
|-----|----------|-------------------------------------------------------------------------------------|----------------------|-----------|-----------|-----------|
|     |          |                                                                                     | H-RNase L            | P-RNase L | H-RNase L | P-RNase L |
| 1   | CC39814  | 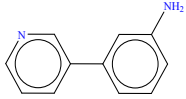   | 202                  | 405       | 0.40      | 0.37      |
| 2   | KM05073  |    | 108                  | 117       | 0.40      | 0.39      |
| 3   | AC39661  |    | 1518                 | 3236      | 0.36      | 0.32      |
| 4   | MAY00266 |    | 790                  | 3091      | 0.36      | 0.29      |
| 5   | RF03759  |   | 1777                 | 1725      | 0.35      | 0.35      |
| 6   | CC22101  |  | 580                  | 617       | 0.35      | 0.35      |
| 7   | KM01280  |  | 2571                 | 613       | 0.33      | 0.41      |
| 8   | CD11333  |  | 826                  | 1926      | 0.33      | 0.29      |
| 9   | SEW05732 |  | 399                  | 272       | 0.32      | 0.33      |
| 10  | KM05951  |  | 209                  | 372       | 0.27      | 0.25      |
| 11  | AC40357  |  | 2369                 | NA        | 0.26      | -         |
| 12  | BTB10184 |  | 2245                 | 2228      | 0.25      | 0.25      |

---

|    |         |                                                                                   |      |      |      |      |
|----|---------|-----------------------------------------------------------------------------------|------|------|------|------|
| 13 | CC14901 |  | 3924 | 0.23 | 2681 | 0.24 |
|----|---------|-----------------------------------------------------------------------------------|------|------|------|------|

---

The  $IC_{50}$  was determined using a FRET-based assay on human or porcine RNase L. Ligand efficiency was calculated using the formula:  $LE = 1.4 \times (-\text{Log}IC_{50}) / \text{HAC}$ . HAC is the number of heavy atoms (or non-hydrogen atoms). NA, not active.

**Table S2.** The potency of AC40357 derivatives against human (H-) and porcine (P-) RNase L

| Compounds  | 2D-Structure                                                                        | IC <sub>50</sub> (μM)<br>H-RNase L | IC <sub>50</sub> (μM)<br>P-RNase L |
|------------|-------------------------------------------------------------------------------------|------------------------------------|------------------------------------|
| Phloretin  | 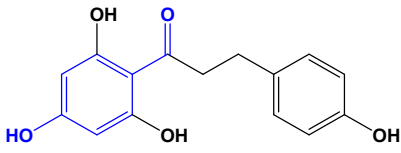   | 883                                | Not active                         |
| Liquiritin |    | Not active                         | Not active                         |
| Myricetin  |   | 264                                | 173                                |
| Hyperoside |  | 1.63                               | 1.26                               |

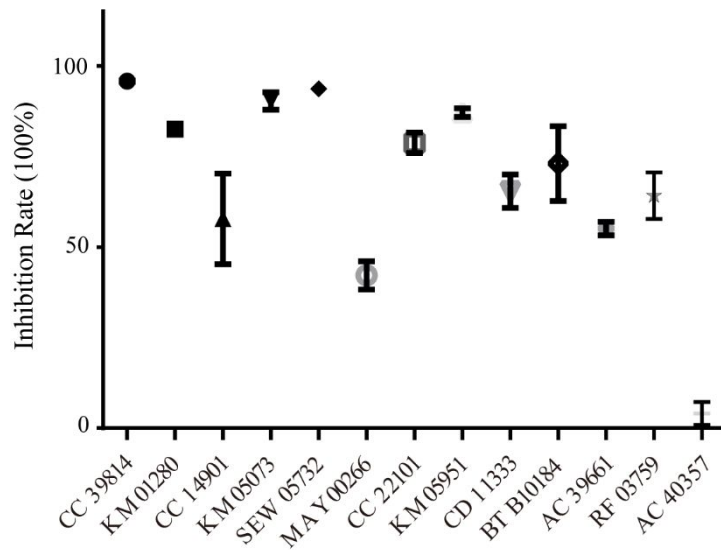

**Figure S1.** The inhibition rates of several fragments against P-RNase L.

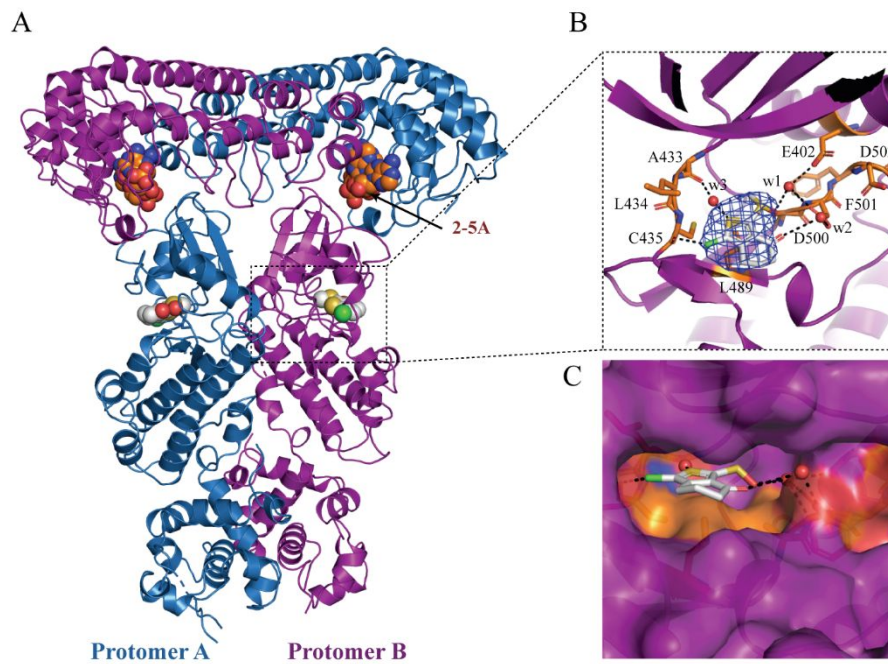

**Figure S2.** Co-crystal structure of the dimeric P-RNase L in complex with the fragment KM05073. (A) The dimer structure of P-RNase L in complex with 2-5A and KM05073. KM05073 bind to the PK domain in both protomers. (B) Stick model of KM05073 in P-RNase L, where the 2Fo-Fc density map of KM05073 is shown as blue mesh and contoured at  $1 \sigma$ . Hydrogen bonds are shown as dotted black lines, and water molecules as red spheres. (C) The surface model KM05073 in P-RNase L.

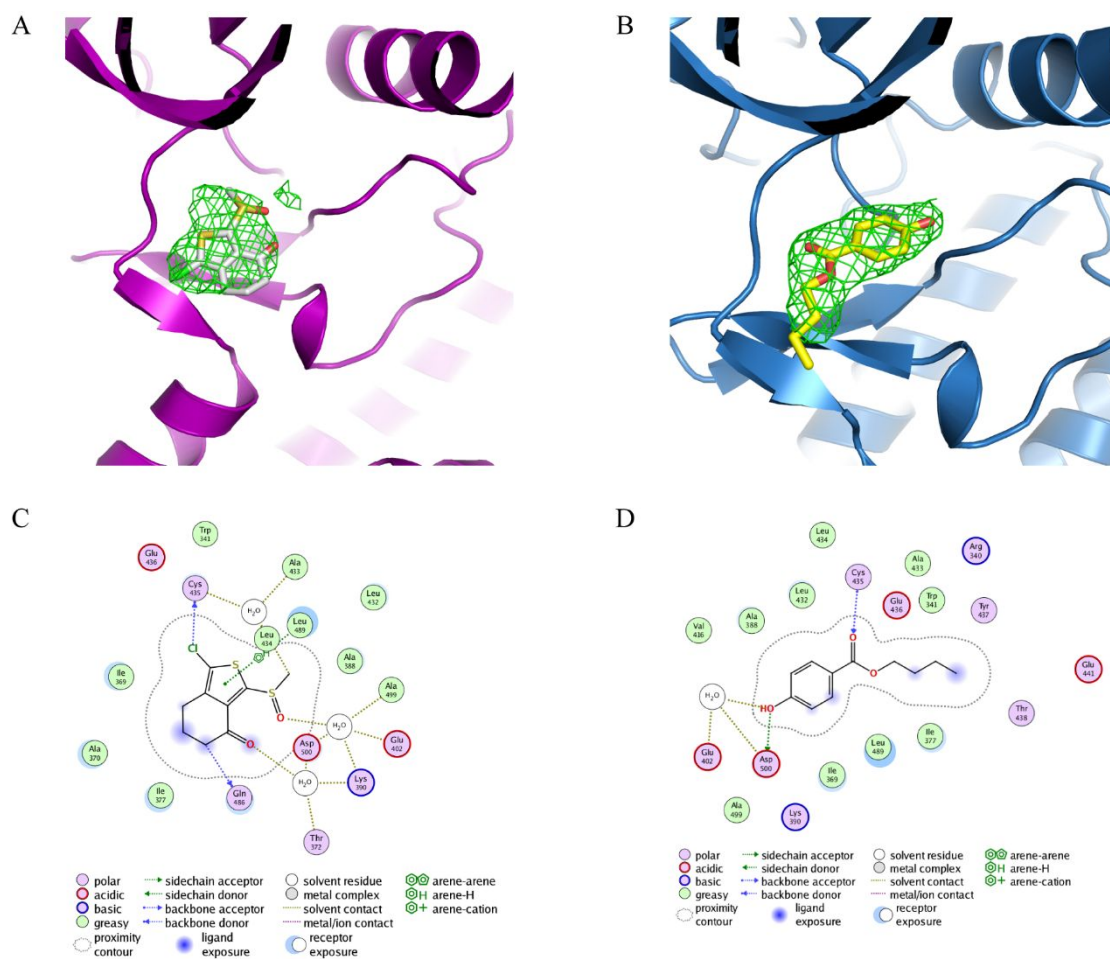

**Figure S3.** The Fo-Fc electron density omit map of fragments and the 2D Ligand interaction diagrams. The Fo-Fc density maps of KM05073 (A) and AC40357 (B) before refinement were shown. Interactions between RNase L and KM05073 (C) or AC40357 (D) were calculated using the MOE software.

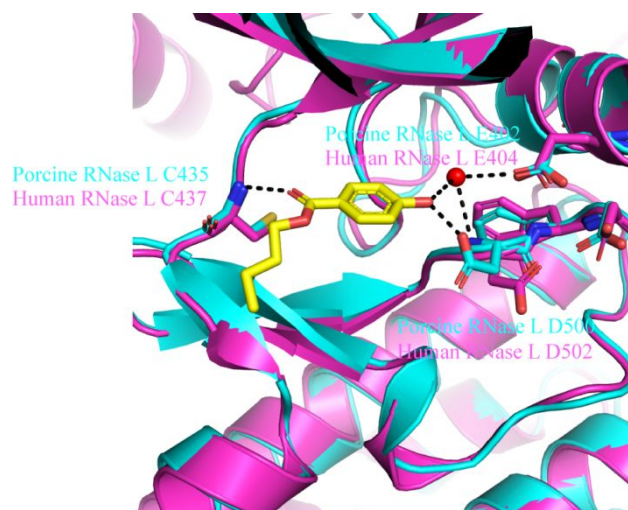

**Figure S4.** Critical residues in the fragments binding pocket are conserved in both human and porcine RNase L. The compound in yellow is AC40357. The ribbon structure in magenta is H-RNase L (PDB 4OAV) with ADP and  $Mg^{2+}$  removed and the structure in cyan is P-RNase L in complex with AC40357 (PDB 7DTS). The binding of AC40357 has caused swing of the side chain of D500 of P-RNase L.

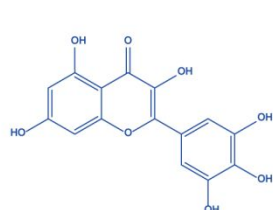

Myricetin

$IC_{50} = 173 \pm 56 \mu M$  P-RNase L  
 $IC_{50} = 264 \pm 48 \mu M$  H-RNase L

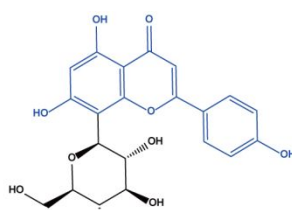

Vitexin

$IC_{50} = 109 \pm 12 \mu M$  P-RNase L  
 $IC_{50} = 190 \pm 16 \mu M$  H-RNase L

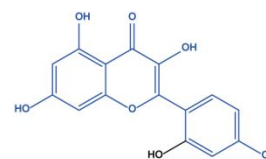

Morin  
 Not active

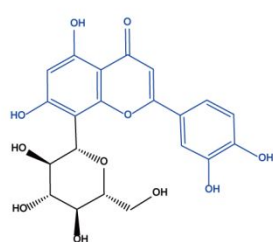

Orientin  
 Not active

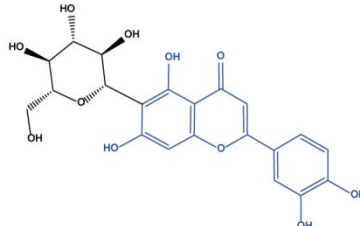

Homorientin  
 Not active

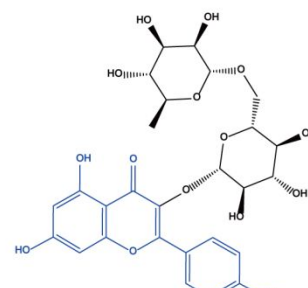

Kaempferol-3-O-Rutinoside  
 Not active

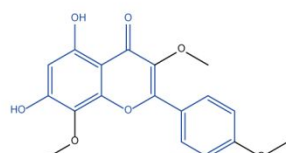

5,7-Dihydroxy-3,4',8-trimethoxyflavone  
 Not active

**Figure S5.** The potency of six myricetin derivatives against human and porcine RNase L.  $IC_{50}$  values represent the mean  $\pm$  SEM of three inhibition profiles. Compounds not active for either



H- or P-RNase L were labelled with Not active.

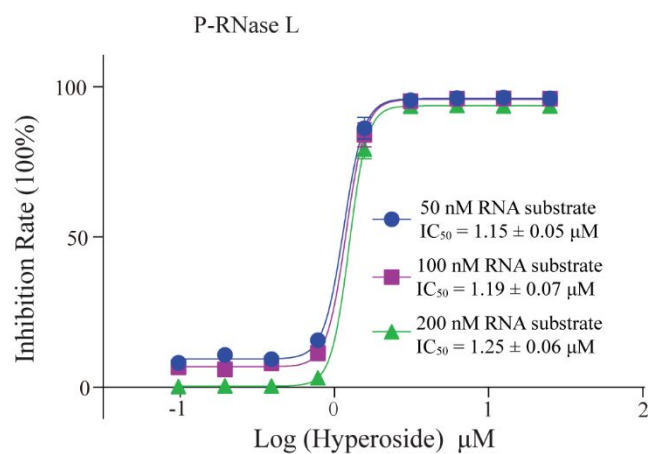

**Figure S6.** RNA substrate concentration does not affect the inhibition of hyperoside against P-RNase L. IC<sub>50</sub> values represent the mean ± SEM of three inhibition profiles.

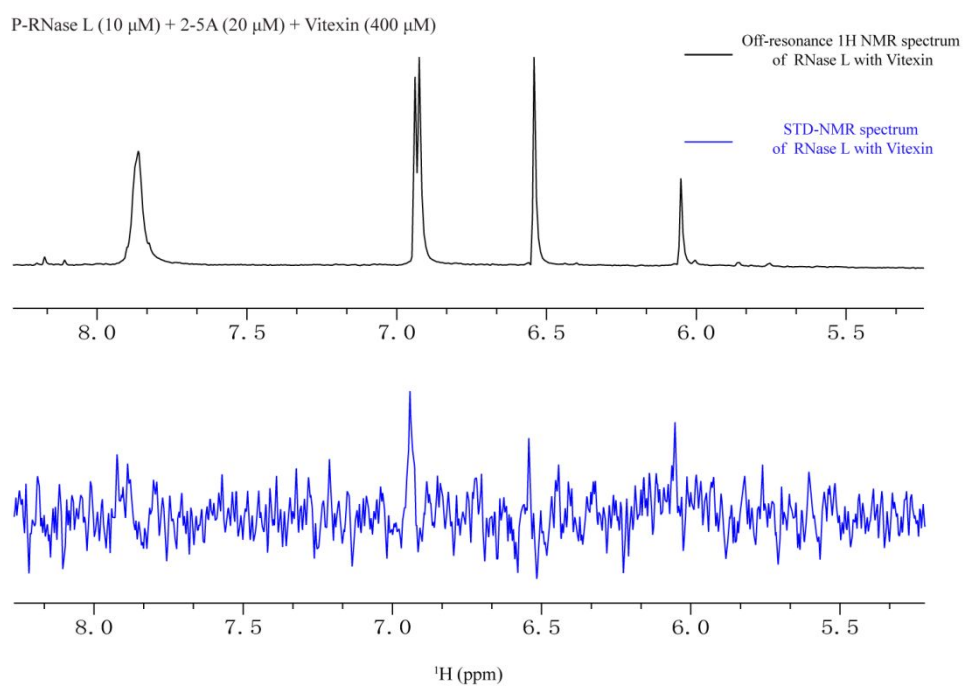

**Figure S7.** STD-NMR showed that vitexin directly binds to P-RNase L.

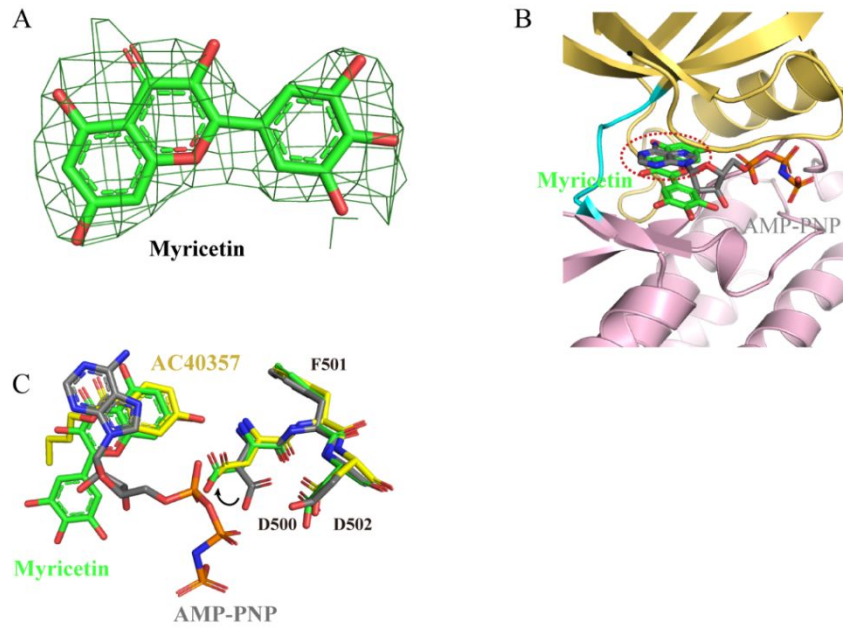

**Figure S8.** The density map of myricetin in the co-crystal structure with P-RNase L and structural comparison. (A) The Fc-Fo density map of myricetin (PDB 7ELW) before refinement was shown as forest green mesh and contoured at  $3.0 \sigma$ . (B) Ribbon plot of P-RNase L showing the superposition of AMP-PNP (PDB 4O1P; gray stick model; nitrogen atoms in blue) and myricetin (green, in this study) on porcine RNase L (PDB 7ELW). (C) Compared with the structure of RNase L/AMP-PNP (PDB 4O1P), myricetin (PDB 7ELW) and AC40357 (PDB 7DTS) in the same binding pocket both induced slight swing of the side chain of D500.

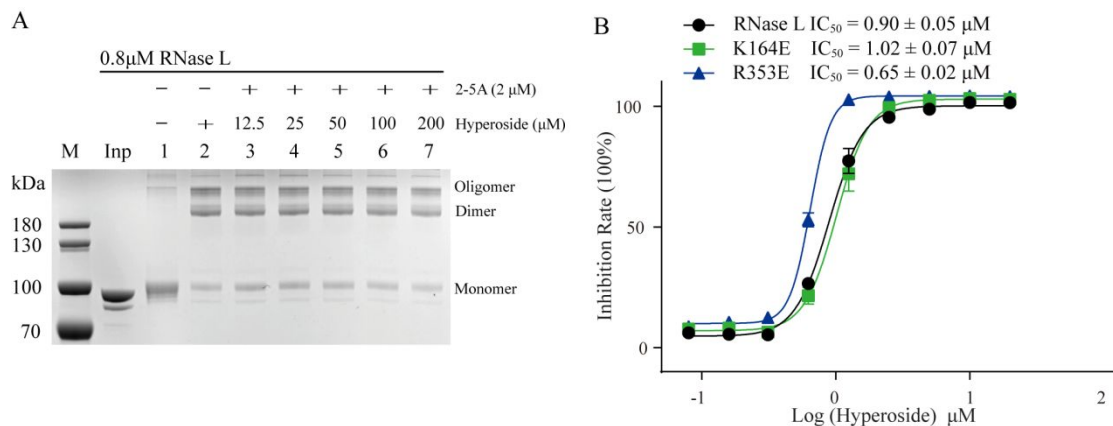

**Figure S9.** The potency of hyperoside was not affected by 2-5A binding. (A) Hyperoside did not affect 2-5A induced P-RNase L oligomerization. (B) Hyperoside displayed similar inhibitory activity against wt-P-RNase L and its two mutants (K164E and R353E).
